# Supplementary material
Source: MDPI journal article supplement (https://www.mdpi.com/2308-3417/7/3/67)
Supplement: s1 [file s1]

## Mealtime Observation

|                                                                                 |                                                                             |           |           |         |                      |
|---------------------------------------------------------------------------------|-----------------------------------------------------------------------------|-----------|-----------|---------|----------------------|
| Date:                                                                           | Reviewed by:                                                                |           |           |         |                      |
| Mealtime: BF                      L                      D                      | Facility:                                                                   |           |           |         |                      |
| No. of residents on TMDs:                                                       | EC7                                                                         | SB6       | MM5       | PU4     | LQ3                  |
|                                                                                 |                                                                             |           |           |         |                      |
| No. of residents on thickened fluids:                                           | EX4                                                                         | MO3       | MT2       | ST1     |                      |
|                                                                                 |                                                                             |           |           |         |                      |
| No. of residents required assistance:                                           | Set up                                                                      |           | Cut up    |         | Feeding              |
|                                                                                 |                                                                             |           |           |         |                      |
| No. of assistant staff:                                                         | Caregivers                                                                  |           | Nurses    |         | Others (e.g. family) |
|                                                                                 |                                                                             |           |           |         |                      |
| Completion of the meals<br>(No. of residents)                                   | All                                                                         | 3/4       | 1/2       | 1/4     | None                 |
|                                                                                 |                                                                             |           |           |         |                      |
| Time to complete meal<br>(No. of residents)                                     | <20 min                                                                     | 20-29 min | 30-39 min | ≥40 min |                      |
|                                                                                 |                                                                             |           |           |         |                      |
| No. of residents on ONS:                                                        | Describe what was left in the plate                                         |           |           |         |                      |
| Did the texture/consistency change prior eating?<br>Y / N                       |                                                                             |           |           |         |                      |
| Did the food/drink use IDDSI label?<br>Y / N                                    | Describe the dinning environment (e.g. distractions, music, communications) |           |           |         |                      |
| Did staff interact with residents?<br>Y / N                                     |                                                                             |           |           |         |                      |
| Was the meal covered and the temperature preserved before consumption?<br>Y / N | Describe the assistance provided by the staff                               |           |           |         |                      |
| Did staff check the food was correctly delivered?<br>Y / N                      | Other notes                                                                 |           |           |         |                      |

Photos attached

List of Abbreviation used in the form

BF- breakfast; L – Lunch; D – Dinner

TMD – texture modified diet; ONS – oral nutritional supplement; IDDSI – International dysphagia diet standardisation initiative

Levels of texture modified diets: EC 7 – level 7 easy to chew; SB6 – level 6 soft and bite-sized; MM5 – level 5 minced and moist; PU4 – level 4 pureed; LQ3 – level 3 liquidised

Levels of thickened fluids: EX 4 – level 4 extremely thickened; MO3 – level 3 moderately thickened; MT2 – level 2 mildly thickened; ST1 – level 1 slightly thickened
