# Supplementary material
Source: MDPI journal article supplement (https://www.mdpi.com/2308-3417/7/3/67)
Supplement: s1 [file s1]

## Supplementary File S1. Menu Audit tool adapted from Dietitian NZ foodservice and nutrition audit sheet

### FACILITY INFORMATION

|                                                                                                                                        |                                    |                                      |                                   |                                        |                                 |                                 |
|----------------------------------------------------------------------------------------------------------------------------------------|------------------------------------|--------------------------------------|-----------------------------------|----------------------------------------|---------------------------------|---------------------------------|
| <b>Organisation Name</b>                                                                                                               |                                    |                                      |                                   |                                        |                                 |                                 |
| <b>Level/type of care provided (current number of residents)</b>                                                                       | Rest home<br>Service Apartments    | Hospital<br>Independent Living       | Dementia<br>Extra Services        |                                        |                                 |                                 |
| <b>Total number of beds</b>                                                                                                            |                                    |                                      |                                   |                                        |                                 |                                 |
| <b>Current occupancy</b>                                                                                                               |                                    |                                      |                                   |                                        |                                 |                                 |
| <b>Ethnicity (cultural diversity of your residents)</b>                                                                                |                                    |                                      |                                   |                                        |                                 |                                 |
| <b>Age of clients</b>                                                                                                                  | Average (approx.)                  |                                      | Age range                         |                                        |                                 |                                 |
| <b>Number of residents</b>                                                                                                             | Male                               |                                      | Female                            |                                        |                                 |                                 |
| <b>Texture Modified Dietary Requirements (current number of residents)</b>                                                             | Easy to Chew:<br>Pureed:           |                                      | Soft & Bite:<br>Thickened fluids: |                                        | Minced & Moist:                 |                                 |
| <b>Number of residents are on supplements</b>                                                                                          |                                    |                                      |                                   |                                        |                                 |                                 |
| <b>Time/Meals of supplementation provided</b>                                                                                          | <input type="checkbox"/> Breakfast | <input type="checkbox"/> Morning tea | <input type="checkbox"/> Lunch    | <input type="checkbox"/> Afternoon tea | <input type="checkbox"/> Dinner | <input type="checkbox"/> Supper |
| Criteria of providing supplements (e.g. resident preference, clinician/family required, observation of resident decreased oral intake) |                                    |                                      |                                   |                                        |                                 |                                 |
|                                                                                                                                        |                                    |                                      |                                   |                                        |                                 |                                 |
| <b>Date of audit report</b>                                                                                                            |                                    |                                      |                                   |                                        |                                 |                                 |

### FOOD SERVICE INFORMATION

|                                                                                |                                                                                                                                                                                                   |           |                |  |                       |         |
|--------------------------------------------------------------------------------|---------------------------------------------------------------------------------------------------------------------------------------------------------------------------------------------------|-----------|----------------|--|-----------------------|---------|
| <b>Type of food service</b>                                                    | <input type="checkbox"/> Cook fresh <input type="checkbox"/> Cook-chill <input type="checkbox"/> Cook-freeze <input type="checkbox"/> Commercial pre-prepared <input type="checkbox"/> Other_____ |           |                |  |                       |         |
| <b>Type of Texture-modified diets provided</b>                                 | <input type="checkbox"/> Made in-house <input type="checkbox"/> Commercial pre-prepared <input type="checkbox"/> Mixed                                                                            |           |                |  |                       |         |
| <b>Fortification of Texture-modified meals</b>                                 | Y/N    Details of fortification_____                                                                                                                                                              |           |                |  |                       |         |
| <b>Is a cycle menu used and if so, how many weeks per cycle?</b>               | Y/N    Number of weeks_____                                                                                                                                                                       |           |                |  |                       |         |
| <b>Is there a separate winter &amp; summer cycle or one menu for the year?</b> | winter and summer cycle                                                                                                                                                                           | <b>OR</b> |                |  | one menu for the year |         |
| <b>Main meal served (please indicate)</b>                                      | Midday                                                                                                                                                                                            |           | <b>OR</b>      |  |                       | Evening |
| <b>Mealtimes</b>                                                               | Breakfast:                                                                                                                                                                                        |           | Lunch:         |  | Dinner:               |         |
| <b>Mid mealtimes</b>                                                           | Morning tea:                                                                                                                                                                                      |           | Afternoon tea: |  | Supper:               |         |

| No. | Objective | Standard | Compliance (Y/N) | Evidence |
|-----|-----------|----------|------------------|----------|
|-----|-----------|----------|------------------|----------|

| SECTION A: Food quantity and nutrition adequacy |                                           |                                                                                                                                                                                                   |  |  |
|-------------------------------------------------|-------------------------------------------|---------------------------------------------------------------------------------------------------------------------------------------------------------------------------------------------------|--|--|
| 1.01                                            | Overall Menu                              | Menu fatigue by residents is minimised through length of menu cycle and variations between seasonal menus.                                                                                        |  |  |
| 1.02                                            | Overall Menu                              | The menu must offer 3 meals and 3 between-meal snacks                                                                                                                                             |  |  |
| 1.03                                            | Overall Menu                              | The menu provides sufficient variety within each of the food groups.                                                                                                                              |  |  |
| 1.04                                            | Overall Menu                              | The menu offers variety within meal types.                                                                                                                                                        |  |  |
| 1.05                                            | Overall Menu                              | The menu reflects seasonal variations in fruit and vegetables.                                                                                                                                    |  |  |
| 1.06                                            | Overall Menu                              | The menu is not planned specifically to use leftovers.                                                                                                                                            |  |  |
| 1.07                                            | Overall Menu                              | The menu should reflect the generational, religious, and cultural food preferences of the residents.                                                                                              |  |  |
| 1.08                                            | Overall Menu                              | Main meal ingredients are not repeated within the same day or on consecutive days                                                                                                                 |  |  |
| 1.09                                            | Overall Menu                              | The meals as planned are likely to be visually appealing and allows for good presentation                                                                                                         |  |  |
| 1.10                                            | Overall Menu                              | There are no generic diabetic menus, nor diabetic options on the standard menu ('diabetic diets' or modifications should only be part of individualised dietitian assessed nutrition care plans). |  |  |
| 1.11                                            | Overall Menu                              | There is provision for specialised diets on the menu where required.                                                                                                                              |  |  |
| 1.12                                            | Overall Menu                              | The menu clearly specifies all IDDSI textures for each meal and snack                                                                                                                             |  |  |
|                                                 |                                           |                                                                                                                                                                                                   |  |  |
| 1.13                                            | Meat / Alternatives                       | At least 2 serves of meat or meat alternatives are offered over the course of the day.                                                                                                            |  |  |
| 1.14                                            | Meat / Alternatives                       | A high protein food must be offered at each meal.                                                                                                                                                 |  |  |
| 1.15                                            | Meat / Alternatives                       | Fish (including canned) is included at least twice a week.                                                                                                                                        |  |  |
| 1.16                                            | Milk & Milk Products                      | At least 3 servings of milk or milk products are offered on the menu each day (excluding incidental use in beverages or soups and excluding cream).                                               |  |  |
| 1.17                                            | Breads, grains, cereals and carbohydrates | High fibre wholegrain products and foods are available throughout the day.                                                                                                                        |  |  |
| 1.18                                            | Fibre                                     | At least one high fibre food should be offered at every meal and at least one snack. (foods with more than 3g/100g of fibre)                                                                      |  |  |
| 1.19                                            | Fruit / Vegetables                        | At least 3 servings of vegetables are offered each day.                                                                                                                                           |  |  |
| 1.20                                            | Fruit / Vegetables                        | At least 2 servings of fruit are offered each day.                                                                                                                                                |  |  |
| 1.21                                            | Fruit / Vegetables                        | At least 1 serving of uncooked fruit is offered daily.                                                                                                                                            |  |  |
| 1.22                                            | Snacks                                    | A high protein option should be available at each snack.                                                                                                                                          |  |  |
| 1.23                                            | Fluids                                    | The menu specifies a variety of fluids to support fluid intake, e.g. range of flavours and hot and cold options.                                                                                  |  |  |
| 1.24                                            | Fluids                                    | The menu specifies at least 8 opportunities per day for fluid intake.                                                                                                                             |  |  |

|                                                               |                       |                                                                                                                                                                                   |  |  |
|---------------------------------------------------------------|-----------------------|-----------------------------------------------------------------------------------------------------------------------------------------------------------------------------------|--|--|
| 1.25                                                          | Texture Modified      | The menu clearly specifies all food textures in line with the IDDSI framework for each meal and snack.                                                                            |  |  |
| 1.26                                                          | Texture Modified      | Foods offered on the texture modified menu allow for a visually appealing meal                                                                                                    |  |  |
| <b>SECTION B: Foodservice &amp; kitchen related standards</b> |                       |                                                                                                                                                                                   |  |  |
| 2.05                                                          | Dining Environment    | The dining room provides a comfortable dining environment that supports food intake. Includes; noise, lighting, odours, space, decorations, table settings, distractions etc.     |  |  |
| 2.06                                                          | Dining Environment    | A menu is on display in the dining room and details the meals for today including any texture modified diets.                                                                     |  |  |
| 2.07                                                          | Dining Environment    | Where required, staff explain to residents what their meal is.                                                                                                                    |  |  |
| 2.08                                                          | Dining Environment    | Residents who finish their meals are offered a second helping                                                                                                                     |  |  |
| 2.09                                                          | Dining Environment    | Desserts are given after the main meal is finished, (to avoid overwhelming/rushing over mealtime and to prevent desserts being eaten instead of eating both the main and dessert) |  |  |
| 2.10                                                          | Dining Environment    | Residents who decline the main meal are offered suitable alternatives. Within reason dislikes are catered for.                                                                    |  |  |
| 2.11                                                          | Dining Environment    | Staff attempt multiple solutions for residents who have not settled for the meal or who are not eating.                                                                           |  |  |
| 2.12                                                          | Dining Environment    | Specialised cutlery, cups and plates are used where necessary to support self-feeding                                                                                             |  |  |
| 2.13                                                          | Dining Environment    | Supervision is provided in all dining rooms and assistance is provided for residents needing help at mealtime, including feeding assistance.                                      |  |  |
| 2.14                                                          | Dining Environment    | If there are residents sleeping or sleepy during mealtime, has this been highlighted with the nursing team as a risk for malnutrition?                                            |  |  |
| 2.15                                                          | Dining Environment    | Staff are able to recall when asked some of the common signs and symptoms of dysphagia during eating and drinking.                                                                |  |  |
| 2.16                                                          | Foodservice Practices | Home baking is incorporated in the menu at least daily                                                                                                                            |  |  |
| 2.17                                                          | Foodservice Practices | Iodised salt is used.                                                                                                                                                             |  |  |
| 2.18                                                          | Foodservice Practices | Commercial soup powders are used only as a base                                                                                                                                   |  |  |

|             |                                    |                                                                                                                                                      |  |  |
|-------------|------------------------------------|------------------------------------------------------------------------------------------------------------------------------------------------------|--|--|
| <b>2.19</b> | Foodservice Practices              | As a dessert or snack, Jelly is only served if it includes a high protein/milk based accompaniment                                                   |  |  |
| <b>2.20</b> | Foodservice Practices              | Cream is used occasionally, not as a replacement for other high calcium and protein dairy accompaniments.                                            |  |  |
| <b>2.21</b> | Foodservice Practices              | Artificial sweeteners are NOT routinely added although are available on site only for resident preference.                                           |  |  |
| <b>2.22</b> | Foodservice Practices              | Sugar-free cordials and drinks are available if clinically indicated.                                                                                |  |  |
| <b>2.23</b> | Foodservice Practices              | There is no separate 'diabetic diet' options prepared (unless required for an individual diet plan developed with input from the clinical dietitian) |  |  |
| <b>2.24</b> | Actioning of Policies & Procedures | Food fortification strategies offer effective solutions to increase the protein and/or energy content of foods, drinks and snacks.                   |  |  |
| <b>2.25</b> | Meal quality                       | The presentation of the meals is good and encourages food intake.                                                                                    |  |  |
| <b>2.26</b> | Meal quality                       | Complete a quality check. Is the quality of the meal (all courses) acceptable.                                                                       |  |  |
| <b>2.27</b> | Hydration                          | It is observed that residents are supported or encouraged to drink during the mealtimes and beverage rounds.                                         |  |  |
| <b>2.28</b> | Hydration                          | A range of suitable beverages is available during beverage rounds or at beverage stations.                                                           |  |  |
| <b>2.29</b> | Menu                               | The menu used on site matches the dietitian reviewed menu                                                                                            |  |  |
| <b>2.30</b> | Menu                               | The meals provided match the menu used on site. The menu is routinely followed by the kitchen staff.                                                 |  |  |
| <b>2.31</b> | Menu                               | There is evidence that menu items not enjoyed by the majority of the residents are either removed from the menu or an alternative is offered.        |  |  |
| <b>2.32</b> | Menu                               | The meal service (foods and drinks) is appropriate for the cultural preferences of the residents being served.                                       |  |  |
| <b>2.33</b> | Menu                               | Feedback from residents suggests that overall the residents enjoy the meals provided.                                                                |  |  |
| <b>2.34</b> | Menu                               | There is a system to monitor high food wastage, (suggesting low food intake) to review the meal option and take corrective action.                   |  |  |

|      |                                    |                                                                                                                                                                                                                                                     |  |  |
|------|------------------------------------|-----------------------------------------------------------------------------------------------------------------------------------------------------------------------------------------------------------------------------------------------------|--|--|
| 2.35 | Actioning of Policies & Procedures | The up-to-date policies for nutrition, foodservice and hydration are accessible in the kitchen.                                                                                                                                                     |  |  |
| 2.36 | Actioning of Policies & Procedures | There is an effective system in the kitchen to ensure all residents requiring a high protein high energy diet receive the foods and drinks in accordance with the individual resident nutrition care plan from the clinical team or dietitian.      |  |  |
| 2.37 | Oral Nutritional Supplements       | Oral nutritional supplements are routinely provided between meals to support food first and allow ONS to provide additional protein and calories. (Exception if ONS prescribed on the medication chart specifically at mealtimes)                   |  |  |
| 2.38 | Oral Nutritional Supplements       | High protein / high energy oral nutrition supplements are provided as prescribed and are prepared in accordance to the dietitian's instructions (or if no specific instructions by the manufacturer's instructions).                                |  |  |
| 2.39 | Oral Nutritional Supplements       | High protein high energy drinks, prepared by the food service are available in addition to, or instead of ONS                                                                                                                                       |  |  |
| 2.40 | Oral Nutritional Supplements       | Recipes for HPHE drinks to be prepared on site are available and are followed.                                                                                                                                                                      |  |  |
| 2.41 | Portion size                       | At least 80g cooked meat (or 135g legumes) per serving is served at the main meal                                                                                                                                                                   |  |  |
| 2.42 | Portion size                       | The main option(s) served at the secondary meal provides a protein source (equivalent to at least 15g protein per serving).<br><br><i>This does not include other meal components served with the meal such as soups, sandwiches, desserts etc.</i> |  |  |
| 2.43 | Portion size                       | At least 3 servings of vegetables are served over the day (serving equivalent to at least 60g - 80g) (excluding potato)                                                                                                                             |  |  |
| 2.44 | Portion size                       | At least 2 servings of fruits are served over the day (serving equivalent to one piece of fresh fruit, 2 x small fruit or 1/2 cups stewed fruit (135g)                                                                                              |  |  |
| 2.45 | Portion size                       | Residents receiving serving sizes less than recommended are identified and additional nutrition strategies are in place to help meet nutritional needs.                                                                                             |  |  |
| 2.46 | Texture Modified                   | Texture modified meals are prepared in accordance with the International Dysphagia Diet Standardisation initiative (IDDSI) Framework: (easy to chew, soft & bite sized, minced & moist, pureed)                                                     |  |  |
| 2.47 | Texture Modified                   | Thickened fluids are prepared in accordance with IDDSI guidelines.                                                                                                                                                                                  |  |  |
| 2.48 | Texture Modified                   | If there is sauce or gravy served with a texture modified meal, it is suitable for the meal and dysphagia requirements.                                                                                                                             |  |  |
| 2.49 | Texture Modified                   | Those on an IDDSI food or fluid prescription are provided the correct meal texture or fluid thickness.                                                                                                                                              |  |  |

|                                              |                    |                                                                                                                                                                                                                                                                                                                                     |  |  |
|----------------------------------------------|--------------------|-------------------------------------------------------------------------------------------------------------------------------------------------------------------------------------------------------------------------------------------------------------------------------------------------------------------------------------|--|--|
| 2.50                                         | Texture Modified   | The presentation of the texture modified meals is good.                                                                                                                                                                                                                                                                             |  |  |
| 2.51                                         | Texture Modified   | The IDDSI standards are displayed in the kitchen                                                                                                                                                                                                                                                                                    |  |  |
| 2.52                                         | Texture Modified   | Any staff involved in texture modified meal preparation is able to demonstrate IDDSI testing for each of the soft & bite-sized, minced and moist, and puree textures.                                                                                                                                                               |  |  |
| 2.53                                         | Texture Modified   | Texture modified meals are not stirred together by supporting staff during feeding.                                                                                                                                                                                                                                                 |  |  |
| 2.54                                         | Texture Modified   | Level 3 Liquidised, Level 4 Puree and Level 5 Minced Moist meals are fortified with added energy and/or protein.                                                                                                                                                                                                                    |  |  |
| 2.55                                         | Texture Modified   | A variety of thickened fluids are offered over the day.                                                                                                                                                                                                                                                                             |  |  |
| <b>SECTION B: Clinical related standards</b> |                    |                                                                                                                                                                                                                                                                                                                                     |  |  |
| 2.56                                         | Clinical Practices | The clinical team monitor weights at least monthly and have highlighted residents with a pattern of unwanted weight loss                                                                                                                                                                                                            |  |  |
| 2.57                                         | Clinical Practices | Nutrition screening for malnutrition using a validated screening tool is conducted for all residents. The clinical team have a record of residents identified as malnourished or at risk of malnutrition.                                                                                                                           |  |  |
| 2.58                                         | Clinical Practices | The malnutrition screening tool is completed correctly and accurately.                                                                                                                                                                                                                                                              |  |  |
| 2.59                                         | Clinical Practices | The nutrition policy for malnutrition and unwanted weight loss is followed for any resident identified as being malnourished or at risk of malnutrition                                                                                                                                                                             |  |  |
| 2.60                                         | Clinical Practices | Further action is taken for any resident with on-going weight loss and/or poor food intake despite nutrition intervention and this includes referral to a dietitian.                                                                                                                                                                |  |  |
| 2.61                                         | Clinical practices | Are there any residents with the following conditions where nutrition intervention can assist with improving outcomes?<br>- wounds and pressure injuries<br>- constipation / diarrhoea / bowel issues<br>- respiratory disease, COPD<br>- GORD<br>- recent surgery<br>- recent hospital admission<br>- fractures<br>- frequent UTIs |  |  |
| 2.62                                         | Clinical practices | For residents with any of the above conditions has additional nutrition support been initiated. Has the clinical dietitian had input?                                                                                                                                                                                               |  |  |

|             |                    |                                                                                                                                                                                                               |  |  |
|-------------|--------------------|---------------------------------------------------------------------------------------------------------------------------------------------------------------------------------------------------------------|--|--|
| <b>2.63</b> | Clinical Practices | Nutrition care plans are individualised and comprehensive.                                                                                                                                                    |  |  |
| <b>2.64</b> | Clinical Practices | Restrictive diets are only implemented if clinically indicated.                                                                                                                                               |  |  |
| <b>2.65</b> | Clinical Practices | All residents requiring or requesting restrictive or specialised diets from the facility, who are not being provided meals from a dietitian audited menu, should have their diets reviewed by a dietitian.    |  |  |
| <b>2.67</b> | Texture Modified   | Resident Food/Nutrition/Dietary Forms have IDDSI texture prescriptions as options for food AND for fluid and a food texture and fluid prescription is indicated for all residents.                            |  |  |
| <b>2.68</b> | Texture Modified   | Any staff involved in the preparation of thickened fluids is able to demonstrate safety testing for each level of fluid thickness.                                                                            |  |  |
| <b>2.69</b> | Texture Modified   | The IDDSI standards are easily accessible to all staff in the facility.                                                                                                                                       |  |  |
| <b>2.70</b> | Texture Modified   | There is a daily fluid monitoring form in place for all residents on thickened fluid requirement - and there is evidence that hydration needs are being met as much as practicable.                           |  |  |
| <b>2.71</b> | Training           | Kitchen staff, nursing staff and caregivers have received training in the past two years, by a dietitian, on the specialised diets required at the site.                                                      |  |  |
| <b>2.72</b> | Training           | Training on basic nutrition and hydration for older adults in aged care facilities has been provided by a dietitian in the past two years to all staff including kitchen staff, caregivers and nursing staff. |  |  |

Note. 2.01-2.04 were questions specifically for dementia unit and were excluded because it was not included in this study.

## SAMPLE MEAL PORTION SIZE AUDIT RESULTS

| Meal component         | Description | Weight       |             |                |        |
|------------------------|-------------|--------------|-------------|----------------|--------|
|                        |             | Easy to chew | Soft & Bite | Minced & Moist | Pureed |
| Meat                   |             |              |             |                |        |
| Potato                 |             |              |             |                |        |
| Rice/pasta             |             |              |             |                |        |
| Vegetables             |             |              |             |                |        |
| Fruits                 |             |              |             |                |        |
| Sauce/gravy            |             |              |             |                |        |
| Dessert (dairy based)  |             |              |             |                |        |
| Ice cream              |             |              |             |                |        |
| Dessert (cake/pudding) |             |              |             |                |        |
| Dessert (fruit based)  |             |              |             |                |        |
| Custard accompaniment  |             |              |             |                |        |
| Cream                  |             |              |             |                |        |
| Snack                  |             |              |             |                |        |
| Drinks                 |             |              |             |                |        |
| Fortification          |             |              |             |                |        |



**References:**

1. Dietitians NZ.Menu audit aged care facilities[Internet]. 2020.<https://www.acefoods.co.nz/files/119/file/MENU-AUDIT>. Accessed 08 May, 2021.
2. New Zealand Ministry of Health. (2010). Food and Nutrition Guidelines for Healthy Older New Zealanders, A Background Paper.
3. Dietitian Association of Australia. Menu review audit tool for aged care homes [Internet]. 2016.<https://daa.asn.au/resource/daa-menu-audit-tool-for-aged-care-homes/>. Accessed 29 March 2019.
